# Supplementary material for: Phaeocystis globosa Virus DNA Polymerase X: a “Swiss Army knife”, Multifunctional DNA polymerase-lyase-ligase for Base Excision Repair
Source: PubMed Central journal article supplement (PMC5537341; doi:10.1038/s41598-017-07378-3), 2017-07-31
Supplement: 41598_2017_7378_MOESM1_ESM.pdf [file 41598_2017_7378_MOESM1_ESM.pdf]

**Supplementary Information**

*Phaeocystis globosa* Virus DNA Polymerase X: a "Swiss Army knife", Multifunctional DNA polymerase-lyase-ligase for Base Excision Repair

**José L. Fernández-García<sup>1</sup>, Ana de Ory<sup>1</sup>, Corina P.D. Brussaard<sup>2</sup> and Miguel de Vega<sup>1,\*</sup>**

<sup>1</sup>Centro de Biología Molecular Severo Ochoa (CSIC-UAM), C/Nicolás Cabrera 1, Campus Cantoblanco, 28049 Madrid, Spain.

<sup>2</sup>Department of Marine Microbiology and Biogeochemistry, NIOZ Royal Netherlands Institute for Sea Research, Utrecht University, NL-1790 AB Den Burg (Texel), The Netherlands

\*To whom correspondence should be addressed: Miguel de Vega, Centro de Biología Molecular Severo Ochoa (CSIC-UAM), C/Nicolás Cabrera 1, Campus Cantoblanco, 28049 Madrid, Spain, Telephone: (+34) 911964717, Fax: (+34) 911964420, E-mail: [mdevega@cbm.csic.es](mailto:mdevega@cbm.csic.es).

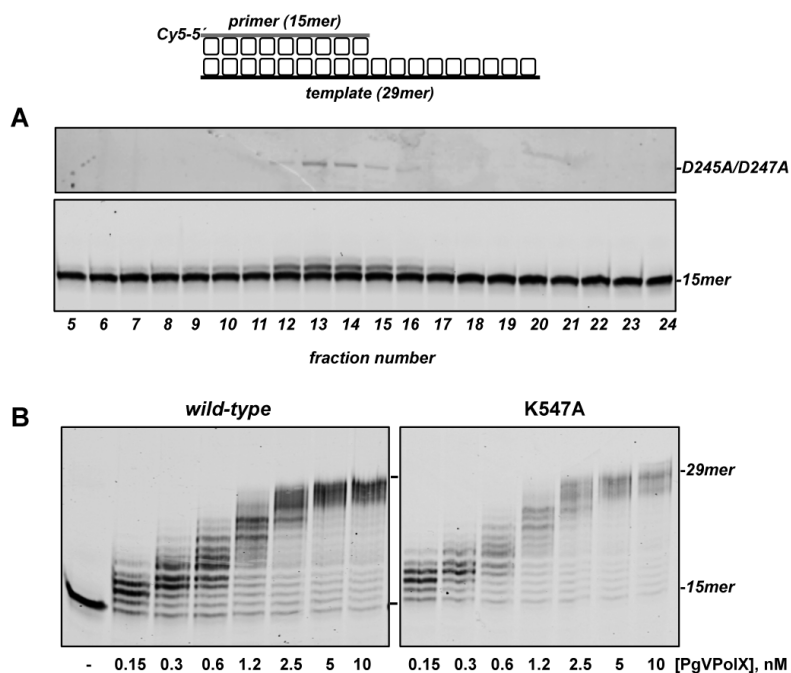

**Supplementary Figure S1. (A)** Sedimentation analysis of the nucleotide insertion capacity of *PgVPolX* mutant D245A/D247A. The upper panel shows the SDS-PAGE analysis followed by Coomassie Blue staining of the glycerol gradient fractions 5-24 of mutant D245A/D247A. The bottom panel shows the polymerization activity of the individual fractions. The assay was carried out as described in Materials and Methods using 25 nM of the primer/template substrate depicted on top of the figure, 2  $\mu$ l of each fraction and 100  $\mu$ M dNTPs. After incubation for 5 min at 30°C, the reactions were stopped by adding EDTA up to 10 mM. Samples were analyzed by 7 M urea-20% PAGE and visualized using a Typhoon 9410 scanner. The position of the primer is indicated. **(B)** Polymerization activity of wild-type and mutant K547A *PgVPolX* on a template/primer substrate. The assay was performed as described in Materials and Methods, in the presence of 25 nM of the primer/template substrate depicted on top of the figure and 100  $\mu$ M dNTPs. After incubation for 5 min at 30°C, the reactions were stopped by adding EDTA up to 10 mM. Samples were analyzed as described in (A).

```

ASFV      MLTLI-Q-----GK--KIVNH-----
PgV16T    MRSIK-Q-----NKRIKKSSQTKKQKLGKLVKSHIKNMGGMKDYKNEYIEILKQLEYNVRVKEKAPFKAKIYREAV-----EQIKNLNGE--
CeV       MSKYLKQQLIKTNSNKLKLSNSAEKLLKKSLLTPENIEAKSMSQSKRYNEEFIEVLGELAQL--MIKKGEPFRSRAIYQKA-----EBAIKFPDD--
APMV      MNSKI-I-----EQFNLEKQVDA-----EYLN--SKVENDLKEETMNRFRLKS IKKAL-----SILKNLDFE--
Mmon      MNANI-I-----EQFSLLVKQIEA-----EYLN--AQVENDVKEINNHKFRLKS VKEIL-----GILKRLDFE--
Mchi      MNSNI-I-----EQFILLVKQIEA-----EYLN--AQVENDVKEISAHKFRLQSNKRIL-----GI IKNLDFE--
CroV      MNSNV-I-----SQFEKLVSKNQI-----DLDN--AIKNKLTDEQRKQSFKLRTNKRVL-----SIIKYPPEEL--
MSenPv    NISNIDL-----NTFMALNKRKI-----IYML--HNIANIYEKLDENKVK--AYNKAINSIYEQGIIILKYNTTITN--
AMenPv    MKIYLDIKQNMNIDNFMMSMINKHKI-----LLVL--NKFADINYLNLEIKYK--AFLNAAIY-----VIQNTVPVIF
Pol β     MSKRK-A-----PQETLNGG--I-----TDML--TELANFEKNVSOAIHKYNAIRKAA-----SVIAKYPHK--

ASFV      -----LR-----
PgV16T    -----VNSADDIKGLSGIGKAITDKLTFEINTGQVKNLEKLEKSEYNTEDYENEKIQAKKDIPLQIHGIGDAAAEKLD--LGIITTEELK
CeV       -----IYNIKQLKNIPIGIGTITLLEEYIKTKGVSVLERERND-----PANILAGIYIGIPKAKELVE--SGIISIAQL--
APMV      -----ITDANDVKGIPGIGAGTIKRIKEILETGKLDLKD--FSPEK--QKQIEG--IQELENVIGSSTAKKLISQYGI RSVDDLK
Mmon      -----ITDPSDLGIRGIGTSTKRRIAEILETGKLSLKNK--YDKKN--NRKM-----
Mchi      -----ITDPSDLNGIQGIGDGTKRRIAEILETGKLSLKNK--YDKKK--QEKINS--IQELERVIGSSTAKKLITKYGITSVKLEK
CroV      -----TINNYKELGDLNGIGKGTITKLNIFEKGYIDELKGY--TAPK--NKNEDI--IKNLEEVINTGRSTAKELVE--SGVKSVDLKL
MSenPv    SPKLVN-----NMETVISKYKIDIPNIGDSISKIYNIISNTYIDNISNT-----KEYKY--ITELMNVLYIGPRTAKNLIS--KGIKTIKDLK
AMenPv    KYKNVNNKFI LN--ESKENIIQKYKLNKSIKTSISDIIYELLSTNKVKELINL--EN-----NSSYKY--IKLITSILFVIGPKKAQSLK--LNKKNINDLI
Pol β     -----IKSGAEAKKLPVGTIAEKIDFELATGKLRKLEKI--RQ-----DDTSSS--INFLTRVSGIGPSAARKFVD--EGIKTLEDLR

ASFV      -----SRLAFEYNGQLIK-----IL--SK--NIVAVGSLRREEKMLNDVLDLIIIVPEKK
PgV16T    ARKNEEIPGKGTKKLKLNLAT-----QQKGLVEYIELEKIPRAEIEEYKTTIEKLFN--EATDNNTED--NKFEIVGYSRRGQESGDHDIITSVND
CeV       -----HDEPG-----IDMLNEK-----QKLGKYYEIEKIPRAEIVFRELKQLFD--KVAPKNSD-----FEIVGSGRGAKTSGDHDIIITNKNNN
APMV      KAIET-----GKVK--VSTS-----IMLGLKYYGIVQRDIPRKEITAEKLLSK-----EAHKIDPD--LEIIICGYSRRGKTSGDHDIIVLHYHPKM
Mmon      -----GEVE--VSNA-----ILLGLKYYGIVEGNIPRKEIDQVKEYLEK-----QAEKINED--LEIMI CGYSRRGKATSGDHDIIIVYHPGM
Mchi      KAKS-----KKIE--VNSK-----ILLGLKYYQIQERIPRNHITEINEFIKRNINFLNKEKLTAKENKYPKICGYSRRNKPTSGDHDIIITQKNTS
CroV      KAKS-----KYLNSQ-----QQIAIEYDYL--KPI NRSFISNLES-----SIKLSPN--KEWYILGYSARGKLTSGDHDIIIVDFDID
MSenPv    KAKS-----NIINMGILTIH--EIKIIEYIKDM--EPVSRNFINDLKQ-----NINLSSE--CEWYILGYSARGLDYSKGDHDIILIDPTID
AMenPv    KAKS-----EDK--LNHH-----QRIGLKYFGDFEKRIPREEMLQMDIVLN-----EVKVDSE--YIATVCGSFRGAESSGDHDIIVLTHPSFT
Pol β     -----

ASFV      LLKHVL-----PNIRIKGLSFSVVKV--GERKCVLFIWE-----K--KTYQDLDLFTALAEKPYAIFHFTGVPVSLIRI RAALKKKNYKL
PgV16T    KT-----SFDKFLDLLKEDIKIVFLSR--GEKKSVMVSKLNS-----ESTARRIDFLYTPPEEYAFAILYFTGSKDFNTGMRMLAKLNNLTL
CeV       RE-----AFDKVLDLRLDKIITVELSRGKTKSLTLVQIKKD-----APIRRVDFLYTPPEYAFALYFTGSKLFTNTVROKALDLGYTL
APMV      TSKEM--LHPEKFDLEPYFNLYIDRLTEKGLDIDITFNPNKMYGFCYK-----LNPVRRIDIRFIPYNSLAPAMLYFTGPMELNTKMSAAKRRKMIL
Mmon      TTKEI--LNHEKYNLEPYFEMYIGQLTNGFLDHDMTDAATKRYMGFCYK-----SYPVRRIDIRFVYQSLPSAMLYFTGPELNTIMRSAAKRRKMIL
Mchi      TTKEI--LNPEKYDLEPYFIFISNLTNKGFLDHDMTDGSNKKYMGFCYK-----SNPVRRIDIRFVYQSLPSAMLYFTGPELNTIMRSAAKRRKMIL
CroV      KTSKY--LDEHLPKI IQMFPKQPKWGNPKPFLDNLTDITPTKYMGEA QFK-----NLPFRIDIRFVSYDSFYTALLYFTGSDGFNVMRNIAKDKGYKL
MSenPv    E-----ILKEIYKAKEAVLRH--GKIMYSGIFPKD-----KTYFLDIDYKTTSEKYTSIQYFTGSKDFNIALRSALSKDIRL
AMenPv    K-----FLEELKIAKLMYIIRK--GNNIFSGVFLWQ-----GKKFIEINKVNNKEYTAIMHFTGSKDFNIFMRNIAKSNMIL
Pol β     SEST-----KQPKLLHQVVBQLQVHFITDTL SKG--BTKFMGVGQCLPSKNDKEYPHRRIDIRLIPKDYQYCGVLYFTGSDIFNKNMRAHALKKGFTI

ASFV      NQYGLFKNQT-----LVPLKITTEKELIKELGFTYRIPKKR
PgV16T    NEHGFHTMKDKIKGDKITSPEFNT EEDIFKYLNMFEKPEHERL
CeV       NEHGLSVMKGIKGVV--DESPPT EASILNFLGFEYVKPENRVD
APMV      NEYGLFKTDKN--GA--QIPLDTKSEADIFHALGMDYLTPOQRELYSSGKI H
Mmon      NEYGLYKVDEN--GL--KIPVTKSEADIFNALGMDYLTPEERESYNTGKVS KAK
Mchi      NEYGLYKVDAN--EI--KTPVKIKSEADIFNALGMDYLTPOQRETFNTGKINKSK
CroV      SEYGLFKIDS-----KNQVPIKSEHVFKILNMDYLEPHLR
MSenPv    NQHEMYDLQT-----QKKYNIKSEKIDIFDLGVKYPVPSKRDIYTTV
AMenPv    NQYSLKKNV-----ELPITKEEDIFDYLKIKYIPNNKRN I
Pol β     NEYTIRLGLVT--GVAGEPLVDSEKIDIFYQWKYREPKDRSE

```

**Supplementary Figure S2.** Multiple amino acid sequence alignment of the Pol β-like core of representatives of NCDLV with human Pol β. Names of virus are abbreviated as follows (numbers in parentheses indicate the corresponding accession number): ASFV, African Swine Fever Virus (NP\_042790.1); APMV, *Acanthamoeba polyphaga* Mimivirus (YP\_003986821.1); Mmon, Moumivirus monve (AEX62672.1, AEX62673.1); Mchi, *Megavirus chiliensis* (YP\_004894637.1); CroV, *Cafeteria roenbergensis* virus (YP\_003970091.1); MSenPv, *Melanoplus sanguinipes* entomopoxvirus (residues 275-603; NP\_048188.1); AMenPv, *Amsacta morei* entomopoxvirus (residues 277-612; NP\_064992.1). White letters boxed in black indicate the three conserved Asp responsible for the polymerization reaction. Yellow letters boxed in black indicate the proposed nucleophile residue responsible for the 5'-dRP lyase activity. The alignment is divided in four subdomains: 8-kDa (green area), fingers (yellow area), palm (pink area) and thumb (blue area).
